# Supplementary material
Source: MDPI journal article supplement (https://www.mdpi.com/2075-163X/12/7/883)
Supplement: s1 [file s1]

## Supplementary information

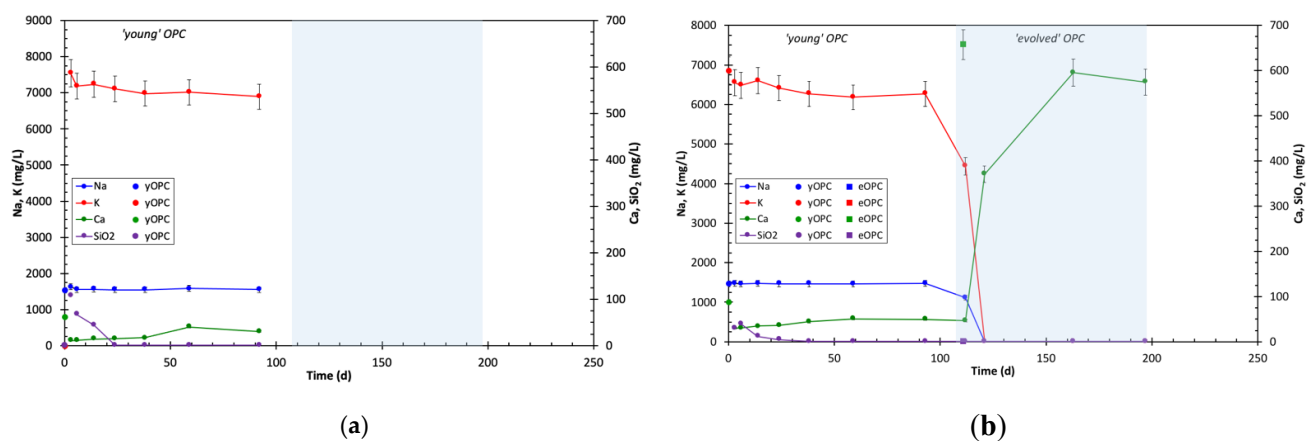

**Figure S1** Major changes in fluid chemistry with time. (a) Toki Granite with 'young' OPC leachate (Col-1); (b) Toki Granite with 'young' OPC, then 'evolved' OPC leachate (Col-2). Legend text: yOPC – 'young' OPC leachate; eOPC – 'evolved' OPC leachate. Lines indicate concentrations in reacted samples; Single points the original concentration in the reacting fluids. X-axis at same scale as Figure 4 for direct comparison of data.

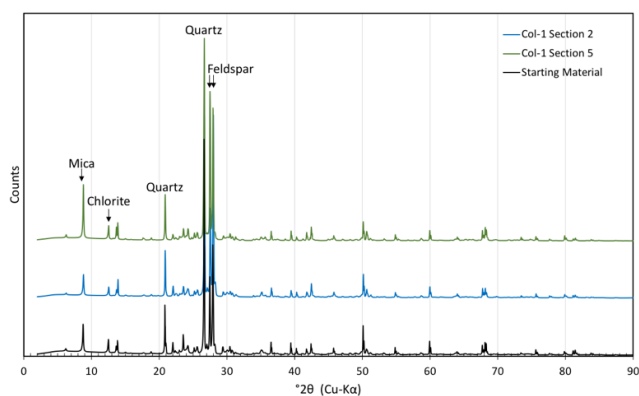

(a)

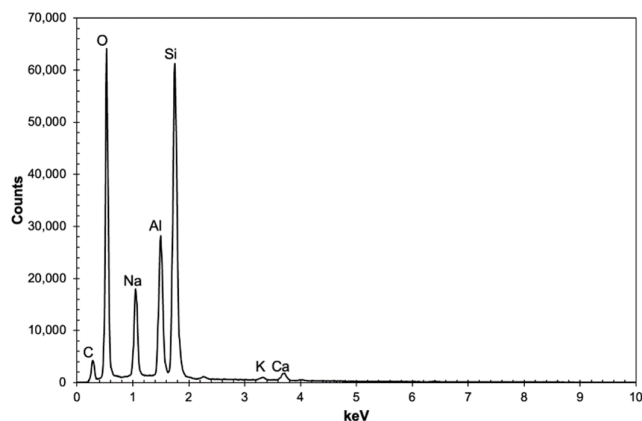

(b)

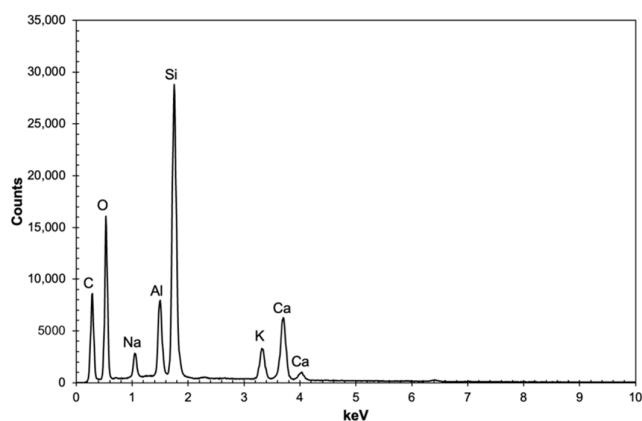

(c)

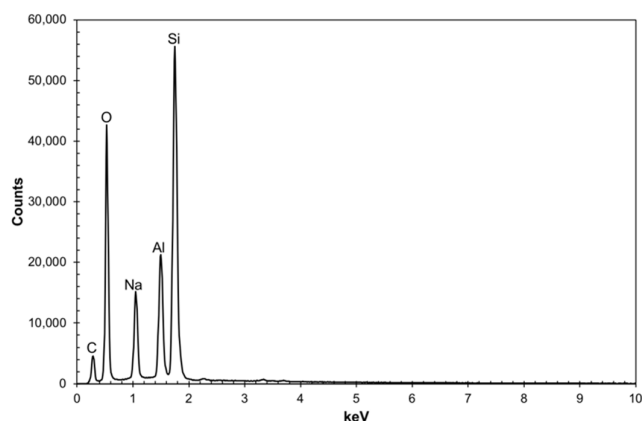

(d)

**Figure S2** (a) X-ray diffractograms (main diffraction lines of key minerals labelled) of unreacted and reacted granite samples experiment with 'young' OPC, (Col-1, Sections 2,5). Showing little difference between unreacted and reacted solids identified by XRD. (b-d) SEM-EDS spectra, see Figure 5 for analysis locations (b) Section 1; (c) Section 5; (d) Section 10.

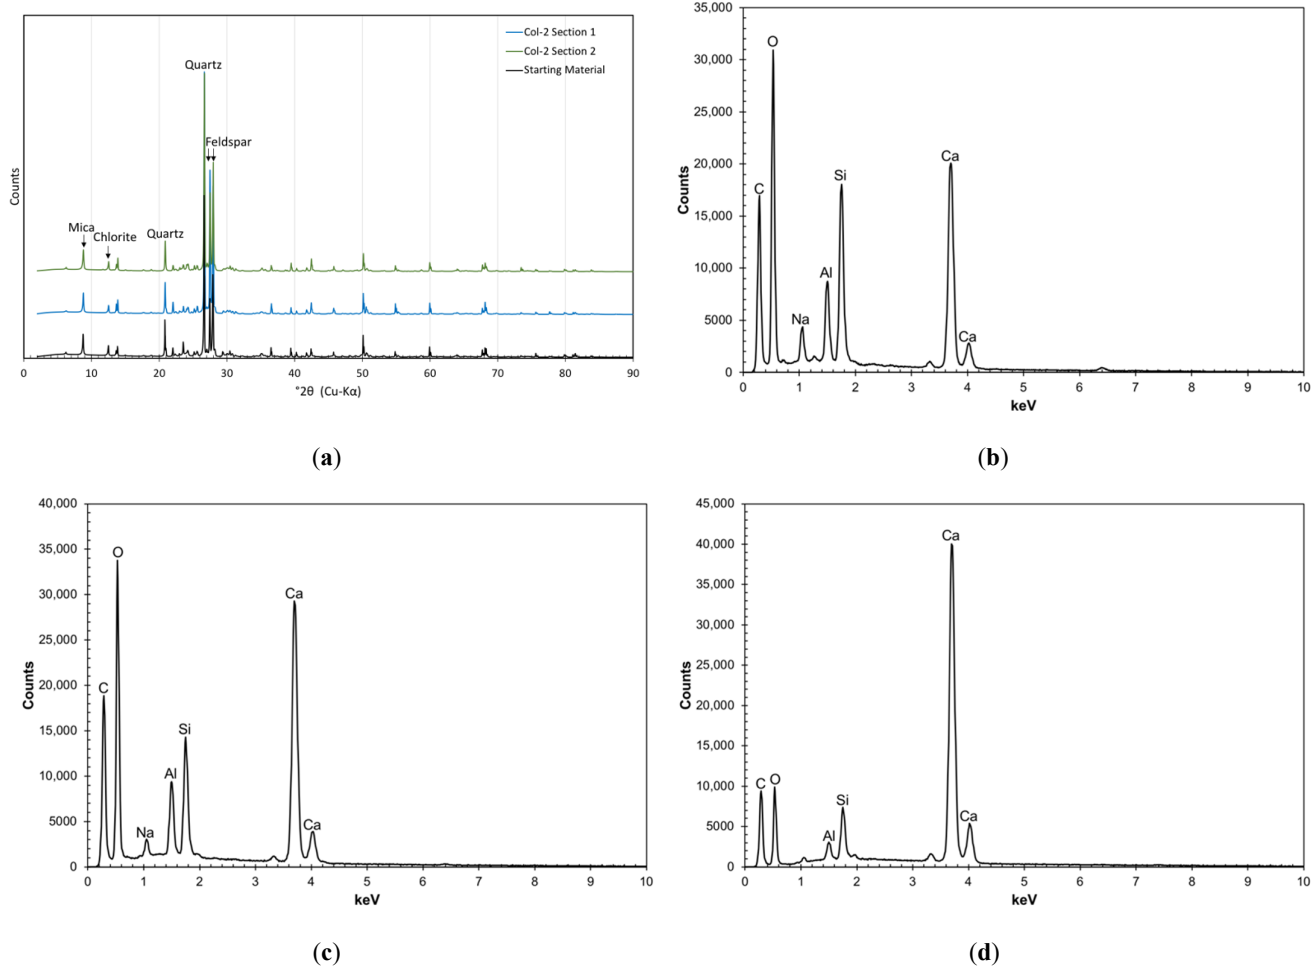

**Figure S3** (a) X-ray diffractograms (main diffraction lines of key minerals labelled) of unreacted and reacted granite samples experiment with 'young' OPC, then the 'evolved OPC leachate (Col-2, Sections 1,2). Showing little difference between unreacted and reacted solids identified by XRD. (b-d) SEM-EDS spectra, see Figure 7 for analysis locations (b) Section 1; (c) Section 5; (d) Section 10.

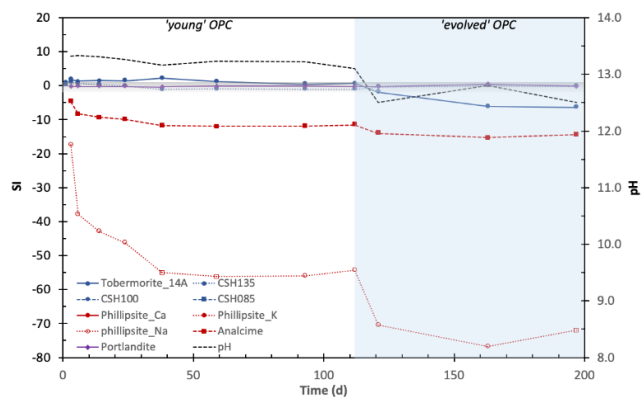

**Figure S4** Selected primary mineral and C-S-H phase saturation states in reacted fluids, experiment with 'young' OPC, then the 'evolved OPC leachate (Col-2).

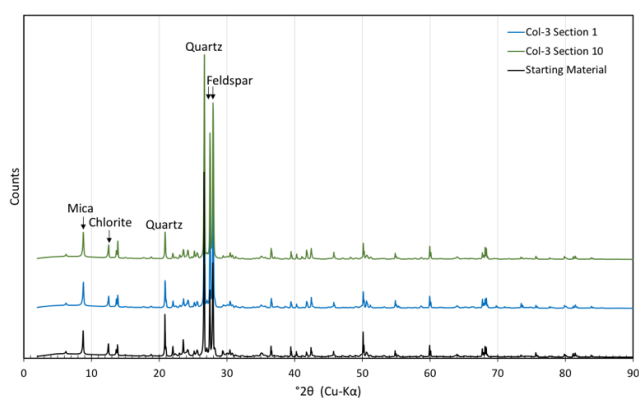

(a)

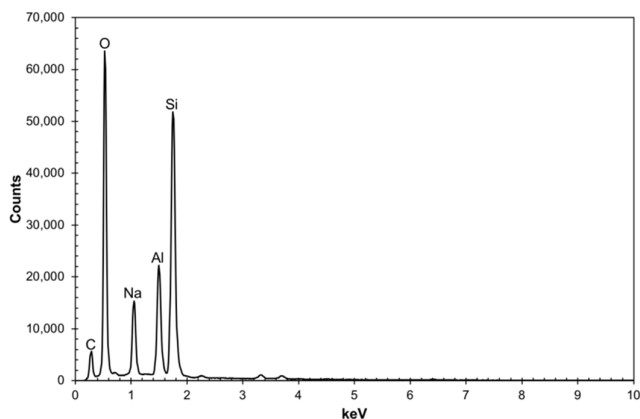

(b)

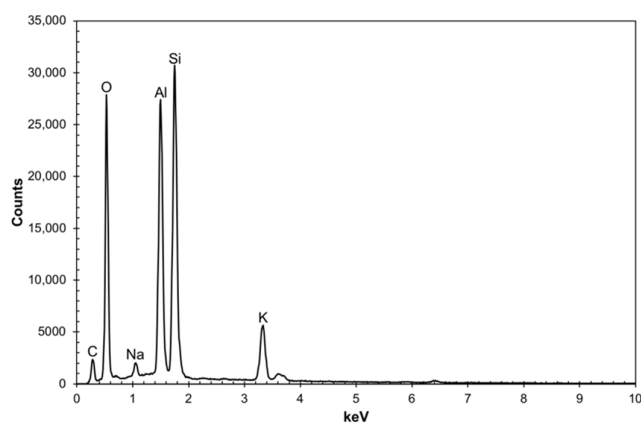

(c)

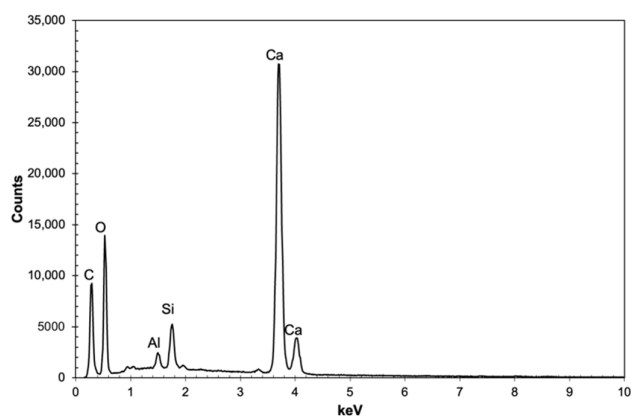

(d)

**Figure S5** (a) X-ray diffractograms (main diffraction lines of key minerals labelled) of unreacted and reacted granite samples experiment with 'young' OPC, then the 'evolved OPC leachate followed by MGW (Col-3, Sections 1,10). Showing little difference between unreacted and reacted solids identified by XRD. (b-d) SEM-EDS spectra, see Figure 8 for analysis locations (b, c) Section 5; (d) Section 18.

### CABARET model parameters.

In order to create the reacting fluids in situ within the CABARET model three hypothetical mineral assemblages were defined. These were then reacted at appropriate timesteps (0, ~40, and ~80 days) with 'pure' water to produce fluids with aqueous chemistry matching that of the OPC leachates and the Horonobe Groundwater.

| Mineral name         | Formula                        | Dissolution reaction                                                                                           | Calculated Log K |
|----------------------|--------------------------------|----------------------------------------------------------------------------------------------------------------|------------------|
| A_YoungOPC_calcium   | Ca(OH) <sub>2</sub>            | $[\text{Ca}(\text{OH})_2] + 2[\text{H}^+] \rightleftharpoons [\text{Ca}^{++}] + 2[\text{H}_2\text{O}]$         | 22.8             |
| A_YoungOPC_chlorine  | HCl                            | $[\text{HCl}] \rightleftharpoons [\text{H}^+] + [\text{Cl}^-]$                                                 | -33.4            |
| A_YoungOPC_aluminium | Al(OH) <sub>3</sub>            | $[\text{Al}(\text{OH})_3] + [\text{H}_2\text{O}] \rightleftharpoons [\text{Al}(\text{OH})_4^-] + [\text{H}^+]$ | -10.4            |
| A_YoungOPC_carbon    | H <sub>2</sub> CO <sub>3</sub> | $[\text{H}_2\text{CO}_3] \rightleftharpoons 2[\text{H}^+] + [\text{CO}_3^{--}]$                                | -36.9            |
| A_YoungOPC_potassium | KOH                            | $[\text{KOH}] + [\text{H}^+] \rightleftharpoons [\text{K}^+] + [\text{H}_2\text{O}]$                           | 12.4             |
| A_YoungOPC_magnesium | Mg(OH) <sub>2</sub>            | $[\text{Mg}(\text{OH})_2] + 2[\text{H}^+] \rightleftharpoons [\text{Mg}^{++}] + 2[\text{H}_2\text{O}]$         | 4.86             |
| A_YoungOPC_sodium    | NaOH                           | $[\text{NaOH}] + [\text{H}^+] \rightleftharpoons [\text{Na}^+] + [\text{H}_2\text{O}]$                         | 11.9             |
| A_YoungOPC_silicon   | Si(OH) <sub>4</sub>            | $[\text{Si}(\text{OH})_4] \rightleftharpoons [\text{Si}(\text{OH})_{4(\text{aq})}]$                            | -24.3            |
| A_YoungOPC_water     | H <sub>2</sub> O               | $[\text{H}_2\text{O}] \rightleftharpoons [\text{H}_2\text{O}]$                                                 | -0.002           |
| A_YoungOPC_sulfur    | H <sub>2</sub> SO <sub>4</sub> | $[\text{H}_2\text{SO}_4] \rightleftharpoons 2[\text{H}^+] + [\text{HSO}_4^-]$                                  | -47.3            |

**Table S1** Calculated Log K<sub>(297.15 K)</sub> for the hypothetical minerals; 'young' OPC leachate.

| Mineral name       | Formula                        | Dissolution reaction                                                                                           | Calculated Log K |
|--------------------|--------------------------------|----------------------------------------------------------------------------------------------------------------|------------------|
| A_OldOPC_calcium   | Ca(OH) <sub>2</sub>            | $[\text{Ca}(\text{OH})_2] + 2[\text{H}^+] \rightleftharpoons [\text{Ca}^{++}] + 2[\text{H}_2\text{O}]$         | 22.9             |
| A_OldOPC_chlorine  | HCl                            | $[\text{HCl}] \rightleftharpoons [\text{H}^+] + [\text{Cl}^-]$                                                 | -32.7            |
| A_OldOPC_aluminium | Al(OH) <sub>3</sub>            | $[\text{Al}(\text{OH})_3] + [\text{H}_2\text{O}] \rightleftharpoons [\text{Al}(\text{OH})_4^-] + [\text{H}^+]$ | -9.74            |
| A_OldOPC_carbon    | H <sub>2</sub> CO <sub>3</sub> | $[\text{H}_2\text{CO}_3] \rightleftharpoons 2[\text{H}^+] + [\text{CO}_3^{--}]$                                | -35.9            |
| A_OldOPC_potassium | KOH                            | $[\text{KOH}] + [\text{H}^+] \rightleftharpoons [\text{K}^+] + [\text{H}_2\text{O}]$                           | -7.60            |
| A_OldOPC_magnesium | Mg(OH) <sub>2</sub>            | $[\text{Mg}(\text{OH})_2] + 2[\text{H}^+] \rightleftharpoons [\text{Mg}^{++}] + 2[\text{H}_2\text{O}]$         | 4.05             |
| A_OldOPC_sodium    | NaOH                           | $[\text{NaOH}] + [\text{H}^+] \rightleftharpoons [\text{Na}^+] + [\text{H}_2\text{O}]$                         | -7.60            |
| A_OldOPC_silicon   | Si(OH) <sub>4</sub>            | $[\text{Si}(\text{OH})_4] \rightleftharpoons [\text{Si}(\text{OH})_{4(\text{aq})}]$                            | -23.7            |
| A_OldOPC_water     | H <sub>2</sub> O               | $[\text{H}_2\text{O}] \rightleftharpoons [\text{H}_2\text{O}]$                                                 | -0.00068         |
| A_OldOPC_sulfur    | H <sub>2</sub> SO <sub>4</sub> | $[\text{H}_2\text{SO}_4] \rightleftharpoons 2[\text{H}^+] + [\text{HSO}_4^-]$                                  | -45.6            |

**Table S2** Calculated Log K<sub>(297.15 K)</sub> for the hypothetical minerals; 'evolved' OPC leachate.

| Mineral name     | Formula                        | Dissolution reaction                                                                                           | Calculated Log K |
|------------------|--------------------------------|----------------------------------------------------------------------------------------------------------------|------------------|
| A_Mizu_calcium   | Ca(OH) <sub>2</sub>            | $[\text{Ca}(\text{OH})_2] + 2[\text{H}^+] \rightleftharpoons [\text{Ca}^{++}] + 2[\text{H}_2\text{O}]$         | 13.4             |
| A_Mizu_chlorine  | HCl                            | $[\text{HCl}] \rightleftharpoons [\text{H}^+] + [\text{Cl}^-]$                                                 | -11.3            |
| A_Mizu_aluminium | Al(OH) <sub>3</sub>            | $[\text{Al}(\text{OH})_3] + [\text{H}_2\text{O}] \rightleftharpoons [\text{Al}(\text{OH})_4^-] + [\text{H}^+]$ | 7.90             |
| A_Mizu_carbon    | H <sub>2</sub> CO <sub>3</sub> | $[\text{H}_2\text{CO}_3] \rightleftharpoons 2[\text{H}^+] + [\text{CO}_3^{--}]$                                | -11.7            |
| A_Mizu_potassium | KOH                            | $[\text{KOH}] + [\text{H}^+] \rightleftharpoons [\text{K}^+] + [\text{H}_2\text{O}]$                           | 3.58             |
| A_Mizu_magnesium | Mg(OH) <sub>2</sub>            | $[\text{Mg}(\text{OH})_2] + 2[\text{H}^+] \rightleftharpoons [\text{Mg}^{++}] + 2[\text{H}_2\text{O}]$         | 11.7             |
| A_Mizu_sodium    | NaOH                           | $[\text{NaOH}] + [\text{H}^+] \rightleftharpoons [\text{Na}^+] + [\text{H}_2\text{O}]$                         | 6.11             |
| A_Mizu_silicon   | Si(OH) <sub>4</sub>            | $[\text{Si}(\text{OH})_4] \rightleftharpoons [\text{Si}(\text{OH})_{4(\text{aq})}]$                            | -3.30            |
| A_Mizu_water     | H <sub>2</sub> O               | $[\text{H}_2\text{O}] \rightleftharpoons [\text{H}_2\text{O}]$                                                 | -0.0000869       |
| A_Mizu_sulfur    | H <sub>2</sub> SO <sub>4</sub> | $[\text{H}_2\text{SO}_4] \rightleftharpoons 2[\text{H}^+] + [\text{HSO}_4^-]$                                  | -21.2            |

**Table S3** Calculated Log K<sub>(297.15 K)</sub> for the hypothetical minerals; Mizunami groundwater.

| Aqueous Basis species         | Aqueous Complex species                  |                                                  |                                                   |
|-------------------------------|------------------------------------------|--------------------------------------------------|---------------------------------------------------|
| H <sub>2</sub> O              | Al(OH) <sub>2</sub> <sup>+</sup>         | CO <sub>3</sub> <sup>2-</sup>                    | MgSiO(OH) <sub>3</sub> <sup>+</sup>               |
|                               | Al(OH) <sub>3(aq)</sub>                  | KCl(aq)                                          | NaAl(OH) <sub>4(aq)</sub>                         |
| Al <sup>+++</sup>             | Al(OH) <sub>4</sub> <sup>-</sup>         | KCO <sub>3</sub> <sup>-</sup>                    | NaCl <sub>(aq)</sub>                              |
| Ca <sup>++</sup>              | CaAl(OH) <sub>4</sub> <sup>+</sup>       | KHCO <sub>3(aq)</sub>                            | NaCO <sub>3</sub> <sup>-</sup>                    |
| Cl <sup>-</sup>               | CaCl <sup>+</sup>                        | KOH(aq)                                          | NaHCO <sub>3(aq)</sub>                            |
| H <sup>+</sup>                | CaCl <sub>2(aq)</sub>                    | KSiO <sub>2</sub> (OH) <sub>2</sub> <sup>-</sup> | NaOH <sub>(aq)</sub>                              |
| HCO <sub>3</sub> <sup>-</sup> | CaCO <sub>3(aq)</sub>                    | KSiO(OH) <sub>3(aq)</sub>                        | NaSiO <sub>2</sub> (OH) <sub>2</sub> <sup>-</sup> |
| K <sup>+</sup>                | CaHCO <sub>3</sub> <sup>+</sup>          | MgAl(OH) <sub>4</sub> <sup>-</sup>               | NaSiO(OH) <sub>3(aq)</sub>                        |
| Mg <sup>++</sup>              | CaOH <sup>+</sup>                        | MgCO <sub>3(aq)</sub>                            | OH <sup>-</sup>                                   |
| Na <sup>+</sup>               | CaSiO <sub>2</sub> (OH) <sub>2(aq)</sub> | MgHCO <sub>3</sub> <sup>+</sup>                  | SiO(OH) <sub>3</sub> <sup>-</sup>                 |
| Si(OH) <sub>4(aq)</sub>       | CaSiO(OH) <sub>3</sub> <sup>+</sup>      | MgOH <sup>+</sup>                                | SiO <sub>2</sub> (OH) <sub>2</sub> <sup>2-</sup>  |
| SO <sub>4</sub> <sup>2-</sup> | CO <sub>2(aq)</sub>                      | MgSiO <sub>2</sub> (OH) <sub>2(aq)</sub>         |                                                   |

**Table S4** Details of the dissolved chemical species included in the CABARET reactive transport model.
